1 **Expression of inducible nitric oxide synthase, nitric oxide and salivary oxidized LDL as**  
2 **early markers of severe dengue**

3

4 Harsha Hapugaswatte<sup>1</sup>, Suharshi S. Perera<sup>2</sup>, Ranjan Premaratna<sup>2,3</sup>, Kapila N. Seneviratne<sup>1</sup>,  
5 Nimanthi Jayathilaka<sup>1\*</sup>

6

7 <sup>1</sup> Department of Chemistry, Faculty of Science, University of Kelaniya, Kelaniya, Sri Lanka

8 <sup>2</sup> North Colombo Teaching Hospital, Ragama, Sri Lanka

9 <sup>3</sup> Department of Medicine, Faculty of Medicine, University of Kelaniya, Kelaniya, Sri Lanka

10

11 \* njayathi@kln.ac.lk

12 94 1 772069887

13

14

15

16

17

18

19

20

21

22

23

24

25

26

27

28

29

30

31

32

33

34

35

36

37

38

39

40

41 **Abstract**

42 *Objectives:* To identify suitable biomarkers during early stages of dengue to predict which  
43 patients would develop severe forms of dengue before the warning signs appear.

44 *Methods:* Expression of inducible nitric oxide synthase (iNOS) and resultant changes in nitric  
45 oxide (NO) and oxidized low density lipoprotein (oxLDL) levels in plasma and saliva were  
46 analyzed.

47 *Results:* Expression of iNOS in patients who later developed dengue haemorrhagic fever (DHF)  
48 showed significant ( $P<0.05$ ) down regulation compared to dengue fever (DF) patients while  
49 those who later developed DHF showed a corresponding significant ( $P<0.05$ ) decrease of plasma  
50 NO levels ( $18.1\pm 3.1 \mu\text{M}$ ) compared to DF patients ( $23.6\pm 4.4 \mu\text{M}$ ) within 4 days from fever  
51 onset. OxLDL levels in plasma showed a decrease in patients who later developed DHF  
52 compared to DF patients although this value was significantly different only within 3 days from  
53 fever onset. The salivary NO levels did not show a significant difference. However, salivary  
54 oxLDL levels were significantly ( $P<0.05$ ) low in patients who later developed DHF ( $0.6\pm 0.2$   
55  $\text{ng/mL}$ ) compared to DF patients ( $1\pm 0.4 \text{ng/mL}$ ) collected within 4 days from fever onset.

56 *Conclusions:* The expression level of iNOS, plasma NO and salivary oxLDL levels may serve as  
57 early markers of severity of dengue infection.

58

59 **Keywords:** Dengue, Dengue Hemorrhagic Fever, inducible nitric oxide synthase, nitric oxide,  
60 oxidized LDL, salivary biomarkers

61

62 **Highlights**

- 63
- 64 • Severity of dengue infection correlates with early differential expression of iNOS
  - 65 • Plasma NO and salivary oxLDL levels may also serve as early markers of severe dengue
  - 66 • Saliva may serve as a non-invasive source of early biological markers for severity of  
dengue infection

67

## 68 **Introduction**

69 Dengue is an extremely prevalent mosquito-borne viral disease in many tropical countries  
70 including Sri Lanka. It is the second most important tropical disease (after malaria) with 284 -  
71 528 million dengue infections resulting in 67 – 136 million clinically manifested dengue cases  
72 with half the global population at-risk posing a significant public health threat worldwide.<sup>1,2</sup> In  
73 2017, 1,86,101 suspected dengue cases were reported to the Epidemiology Unit of Sri Lanka  
74 from all over the island.<sup>3</sup> Most people infected with dengue viruses are asymptomatic while  
75 others may suffer a wide range of clinical manifestations from mild fever to severe dengue.  
76 Although a serious, debilitating condition, dengue fever (DF) is not fatal while severe  
77 manifestations of the disease such as dengue haemorrhagic fever (DHF) and dengue shock  
78 syndrome (DSS) are major causes of hospitalization and death, globally.<sup>1,4</sup> Currently, the number  
79 of DHF cases in Sri Lanka has dramatically increased.<sup>5</sup> Unlike DF, severe dengue is  
80 characterized by severe possibly lethal vasculopathy marked with plasma leakage, intrinsic  
81 coagulopathy and massive internal bleeding.<sup>6,7</sup>

82 Despite the social and clinical impact, there are no antiviral therapies available for  
83 treatment of dengue.<sup>8</sup> The vaccine that is licensed in 18 countries has several limitations because  
84 it is only recommended for individuals aged 9-45 years who have had previous exposure to  
85 dengue.<sup>9</sup> As such, prevention is mostly limited to vector control measures. While several  
86 efficient and relatively reliable diagnostic tests based on PCR or serological testing are available  
87 for detection of dengue virus infections, these diagnostic tests do not distinguish between DF and  
88 severe dengue.<sup>10</sup> Limited progress has been made in finding markers that can indicate the  
89 evolution of dengue infection to the severe form of the illness at an early stage of infection.  
90 Infact, a diagnosis of disease severity is usually made after the patient is presented with severe  
91 dengue symptoms. Several studies have compared the transcriptomes of patients that developed  
92 DF with those who developed DHF to identify molecular markers such as cytokines associated  
93 with disease severity.<sup>7,11-17</sup> In a genome-wide association study, genetic variants in MICB and  
94 PLCE1 has been found to be associated with severe dengue.<sup>18</sup> Allelic forms of MICA and MICB,  
95 on the other hand, has been found to strongly associate with susceptibility to illness but not  
96 severe cases.<sup>19</sup> Recent studies have also reported differential expression in microRNA in dengue  
97 patients and infected cultured cells.<sup>20-24</sup> However, most of the patient studies do not limit the  
98 sample pool to acute phase of infection at which differential diagnosis is not possible. Thus,  
99 despite these efforts, endeavors to discover a prognostic test for severe dengue is yet to become  
100 part of the dengue clinical tests, leaving much to be done in finding a solution to this public  
101 health crisis.

102 Inducible nitric oxide synthase (iNOS) has been implicated in host response to dengue  
103 virus infection.<sup>25</sup> Expression of iNOS results in nitric oxide (NO) biosynthesis resulting in  
104 generation of a highly reactive nitrogen oxide species, peroxynitrite, via a radical coupling  
105 reaction of NO with superoxide which in turn causes potent oxidation and nitration reactions of  
106 various biomolecules including lipids. NO which plays a complex and diverse physiological and

107 pathophysiological role may serve as an early prognostic marker in dengue.<sup>26</sup> iNOS activity and  
108 plasma NO has been implicated in inflammatory responses and plasma leakage.<sup>25</sup> Severe dengue  
109 is characterized by thrombocytopenia (low platelet count) and plasma leakage. A recent study  
110 evaluating the levels of NO in patient samples from DF and DHF patients indicate the potential  
111 of these molecular markers to serve as early markers of disease prognosis in serum.<sup>27</sup> However,  
112 the levels of these reactive oxygen species (ROS) and reactive nitrogen species (RNS) were not  
113 evaluated for their potential as early markers of the disease in other biological fluids. Therefore,  
114 in this study, we evaluated whether the severity of dengue infection is correlated with early  
115 differential expression of iNOS and resultant changes in NO levels and oxidized low density  
116 lipoprotein (oxLDL) levels in plasma from patients who tested positive for dengue within 4 days  
117 from fever onset before severe symptoms are presented. Levels of biomarkers such as LDL in  
118 saliva has been reported to correlate with serum and plasma LDL levels.<sup>28</sup> Since saliva is a safe  
119 and easy to handle biological fluid that can be collected using non-invasive measures, we also  
120 evaluated the salivary NO and oxLDL levels in samples from patients presented with symptoms  
121 of dengue fever during the early stages of infection with those who later developed DHF.  
122 The development and the severity of DHF can be mitigated with proper disease management. If  
123 diagnosed early before severe symptoms are presented, effective disease management of severe  
124 dengue only involves hospital care and hydration. Identifying early molecular markers of severe  
125 dengue may help distinguish dengue patients who would benefit from early intensive therapy and  
126 hospitalization before severe symptoms appear and increase the availability of public health  
127 resources and also mitigate the cost of public health and the impact on the national economy.

128

## 129 **Materials and Methods**

130 **Sample collection and processing:** Patients presented with clinical symptoms of dengue viral  
131 infection according to WHO Dengue case classification (fever, with two of the following criteria:  
132 headache, retro-orbital pain, myalgia, arthralgia, rash, hemorrhagic manifestations with no  
133 plasma leakage, and following laboratory findings leucopenia, thrombocytopenia, rising  
134 hematocrit with no evidence of plasma loss) within 4 days from fever onset who tested positive  
135 for onsite NS1 rapid test (SD Bio) were recruited for the study from the North Colombo  
136 Teaching Hospital, Ragama, Sri Lanka with informed consent. Patients who later develop DHF  
137 were determined according to the WHO guidelines; Fever and Hemorrhagic manifestation  
138 (positive tourniquet test) with evidence of plasma leakage (pleural effusions and ascites detected  
139 using a portable bedside ultrasonogram), spontaneous bleeding, circulatory failure, profound  
140 shock with undetectable BP and pulse, thrombocytopenia  $< 100\ 000$  cells / mm<sup>3</sup>, and HCT rise  $>$   
141 20%.<sup>29</sup> A questionnaire was used to collect information pertaining to alcohol consumption,  
142 smoking habits and dietary intake. 2.5 mL blood was collected in to EDTA tubes and  
143 approximately 500  $\mu$ L saliva was collected by spit method. The samples were collected from  
144 patients within 4 days from fever onset and transported and processed at 4 °C within an hour

145 from sample collection. Isolated peripheral blood cells (PBC) and saliva samples (after adding 30  
146 mM NaOH) were stored at  $-80^{\circ}\text{C}$  until sample analysis. Ethical clearance for patient sample  
147 collection was obtained from the ethics review committee of the Faculty of Medicine, University  
148 of Kelaniya, Kelaniya, Sri Lanka (Reference number-P/119/07/2015).

149 **Quantitative Real-time PCR:** Gene specific human primers against the reference gene GAPDH  
150 and iNOS were mined from previously published literature.<sup>30</sup> Total RNA was isolated from  
151 peripheral blood cells using miRNeasy serum/plasma kit (Qiagen) with 700  $\mu\text{L}$  QIAzol Lysis  
152 buffer and 140  $\mu\text{L}$  chloroform according to the manufacturer's instructions. cDNA was  
153 synthesized using the miScript II RT Kit with Hiflex buffer from 12  $\mu\text{L}$  extracted total RNA  
154 according to product manual (Qiagen). Expression of mRNA was quantified using QuantiTect  
155 SYBR Green PCR kit (Qiagen) according to product manual. Each reaction was carried out in  
156 triplicates in 20  $\mu\text{L}$  reaction volume using StepOne real-time PCR Thermal Cycler (Applied  
157 Bio). The efficiency of amplification for iNOS was 106 % and GAPDH was 110 % based on the  
158 standard curve analysis. No-template reactions and melting curve analysis was used to confirm  
159 specificity of target amplification.

160 **Quantification of plasma and salivary nitric oxide by Griess reaction:** Nitrite content in  
161 plasma was measured according to a previously reported method using Griess reaction against a  
162 standard series of  $\text{NaNO}_2$ .<sup>31</sup> Plasma sample (60  $\mu\text{L}$ ) was deproteinized with 7.5  $\mu\text{L}$  of 200 mM  
163  $\text{ZnSO}_4$  prior to assay for nitrites.

164 Salivary nitrite levels were detected by Griess colorimetric reaction as total nitrates and  
165 nitrites as described by Miranda, Espey and Wink, (2000) with some modifications<sup>32</sup>. Saliva  
166 sample (120  $\mu\text{L}$ ) was deproteinized with 15  $\mu\text{L}$  of 200 mM  $\text{ZnSO}_4$  and mixture was centrifuged  
167 for 3 min at 10,000 g at room temperature. 50  $\mu\text{L}$  of supernatant, 50  $\mu\text{L}$  of 2 % (w/v)  
168 sulfanilamide in 5 % HCl (v/v) and 50  $\mu\text{L}$  of 1 % (w/v) N-(1-Naphthyl) ethylenediamine  
169 dihydrochloride in water were mixed to a final volume of 200  $\mu\text{L}$ . Mixture was incubated at  
170 room temperature for 20 mins and absorbance at 540 nm was measured using Multiskan Go  
171 spectrophotometer (Thermo Scientific). Conversion of nitrates to nitrites by  $\text{VCl}_3$  followed by  
172 colorimetric analysis for nitrites using Griess reaction did not give higher nitrite reading  
173 indicating that there are no nitrates in the samples.

174  
175 **Quantification of plasma and salivary oxLDL by ELISA:** oxLDL content in plasma and saliva  
176 was measured using human oxLDL ELISA kit (Elabscience) according to the manufactures  
177 protocol with minor modifications. 5  $\mu\text{L}$  of plasma was diluted 1:1000 in phosphate buffered saline  
178 (PBS, pH 7) and 25  $\mu\text{L}$  of diluted sample was assayed. 10  $\mu\text{L}$  saliva was assayed in antibody pre  
179 coated well of micro ELISA plate after dilution with 15  $\mu\text{L}$  of PBS (pH 7). The oxLDL  
180 concentration was calculated based on the concentration series of reference standards of oxLDL  
181 provided with the assay kit as follows. Diluted saliva sample was removed from the well and 100  
182  $\mu\text{L}$  of biotinylated detection Ab was added into the well and incubated for 60 mins at  $37^{\circ}\text{C}$ . Liquid  
183 was aspirated and 100  $\mu\text{L}$  of horse radish peroxidase conjugate was added into the well after 3

184 washes with wash buffer and incubated for 30 mins at 37 °C. Liquid was aspirated and 90 µL of  
185 substrate reagent was added following 5 washes with wash buffer and incubated for 15 mins at 37  
186 °C. 50 µL of stop solution was added and the absorbance was read at 450 nm by using Multiskan  
187 Go spectrophotometer (Thermo Scientific).

188 **Statistical Analysis:** q-q plots and Shapiro-Wilk test were used to determine normality at a 95%  
189 confidence interval. For the Shapiro-Wilk test  $P > 0.05$  was determined as normal distribution.  
190 The fold change of expression was calculated using the  $\Delta\Delta Cq$  method. A difference in  
191 expression based on fold change of log base 2, less than 0.5 between DF and DHF cases was  
192 considered as downregulation and above 1.5 was considered as upregulation. Statistical  
193 significance for differentially expressed targets were determined based on the SEM of  $\Delta Cq$  using  
194 independent t-test (SEM: Standard error of mean). Statistically significant differences among the  
195 mean  $\pm$  SD and mean  $\pm$  SD of 5<sup>th</sup> – 95<sup>th</sup> percentile was determined using independent t-test.  
196 Statistically significant differences among the median  $\pm$  MAD and median  $\pm$  MAD of 5<sup>th</sup> – 95<sup>th</sup>  
197 percentile was determined using Mann-Whitney U test for non-parametric independent samples  
198 (MAD: median absolute deviation).  $P < 0.05$  was considered statistically significant. Logistic  
199 regression analysis for odds ratio, receiver operator characteristics, area under curve, specificity  
200 and sensitivity was determined using IBM SPSS Statistics, 2013 version at a 95 % confidence  
201 interval. Sample sizes were calculated using G\*Power 3.1.9.2 software at 95 % confidence  
202 interval with a power of 80 % for normally distributed samples using parametric test and skewed  
203 distributions using non-parametric test. Pearson correlation analysis at 95 % confidence interval  
204 was used to determine correlation between the different parameters against the platelet counts.

205

## 206 **Results and Discussion**

### 207 **iNOS expression in Dengue patients within four days from fever onset**

208 Thirty-nine patients suspected of having dengue based on clinical classification adopted  
209 by WHO (2012) with positive diagnosis for dengue infection by viral NS1 rapid test,  
210 hospitalized at the North Colombo Teaching Hospital, Sri Lanka were recruited for the gene  
211 expression analysis. Among them, 19 (48.7 %) patients were classified as dengue fever (DF) and  
212 20 (51.2 %) patients who later showed evidence of plasma leakage (pleural effusions and ascites)  
213 as detected using a portable ultrasonogram were classified as DHF according to the clinical  
214 classification adopted by WHO.<sup>29</sup> Most of the subjects were male (77 %), with a median age of  
215 30 (18-60) while the female subjects had a median age of 24 (19-60) years. At enrollment, there  
216 were no statistically significant differences in mean, median, and 5<sup>th</sup> – 95<sup>th</sup> percentile of mean  
217 and median laboratory clinical parameters such as thrombocytopenia, leukopenia, hematocrit  
218 count and AST and ALT levels in patients who later developed DHF compared with DF (**Table**  
219 **1, Table S1**). Circulating AST and ALT levels were not significantly different between these two  
220 groups throughout the course of infection (**Table S2**).

221 **Table 1**

222 Clinical characteristics of dengue patients subjected to iNOS expression analysis at the time of  
223 admission (Mean  $\pm$  SD).

|                                                  | DF patients<br>(n=19) | DHF patients<br>(n=20) | P value<br>CI, 95 % |
|--------------------------------------------------|-----------------------|------------------------|---------------------|
| Gender (Male % / Female %)                       | 68/32                 | 85/15                  |                     |
| Age                                              | 34 (18-60)            | 29 (19-60)             |                     |
| Hematocrit (%)                                   | 39.9 $\pm$ 4.7        | 39.4 $\pm$ 3.9         | 0.74                |
| Hemoglobin (g/dL)                                | 13.6 $\pm$ 1.5        | 12.4 $\pm$ 3.1         | 0.14                |
| White blood cells (x1000 cells/mm <sup>3</sup> ) | 15.1 $\pm$ 26.8       | 20.6 $\pm$ 67.7        | 0.74                |
| Neutrophils (%)                                  | 58.2 $\pm$ 23.1       | 68.7 $\pm$ 20.8        | 0.16                |
| Lymphocytes (%)                                  | 28.2 $\pm$ 15.7       | 19.2 $\pm$ 13.6        | 0.08                |
| Eosinophils (%)                                  | 3.9 $\pm$ 10.1        | 1.2 $\pm$ 1.2          | 0.28                |
| AST (U/L)                                        | 43.9 $\pm$ 17.9       | 54.4 $\pm$ 24.2        | 0.26                |
| ALT (U/L)                                        | 39.3 $\pm$ 17.5       | 45.8 $\pm$ 23.1        | 0.47                |

224

225 Since iNOS has been implicated in host response to dengue virus infection, iNOS  
226 expression in PBC harvested from EDTA blood collected during the acute phase (within four  
227 days from fever onset) was evaluated by qRT-PCR. DHF patients showed significant ( $P < 0.05$ )  
228 down regulation of iNOS expression within 4 days from fever onset. Furthermore, iNOS  
229 expression in DHF patients significantly decreased on day three from fever onset and continued  
230 to decrease till day four from fever onset (**Fig. 1a, Table 2**). Further analysis of iNOS expression  
231 among the male patients (DF; n = 13 and DHF; n = 17) and female patients (DF; n = 6 and DHF;  
232 n = 3) showed similar downregulation of iNOS expression (**Fig. 1b**). Expression analysis of  
233 iNOS among the patients who showed signs of thrombocytopenia ( $< 100,000/\text{mm}^3$  platelets)  
234 during illness against those who did not develop thrombocytopenia, and a platelet count of  $<$   
235  $60000/\text{mm}^3$  as an indicator of severe dengue during illness against the patients of whom the  
236 platelet count did not drop below  $60000/\text{mm}^3$  during the course of illness did not show  
237 differential iNOS expression indicating that the expression of iNOS is not correlated with the  
238 drop in platelet count ( $r = 0.05$ ) (**Fig. 1c**).

239

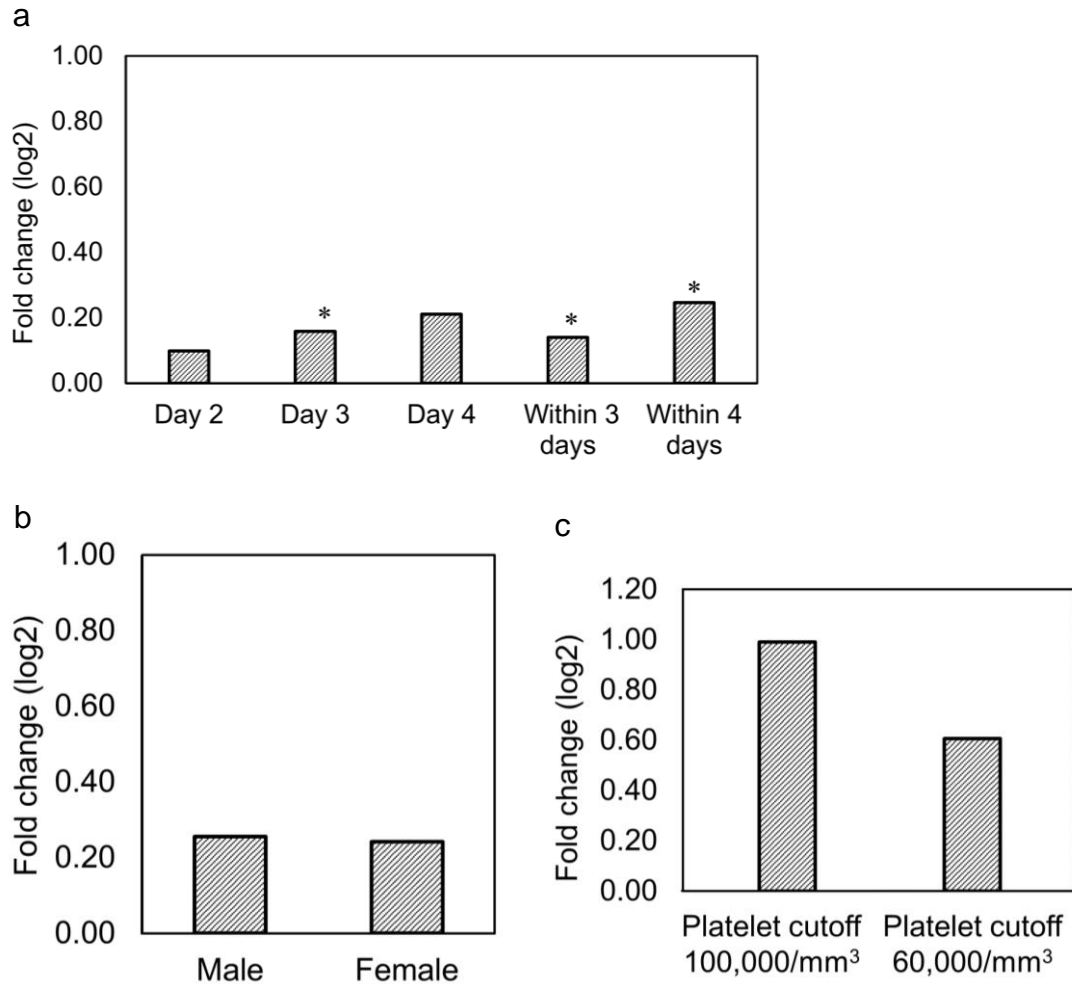

240

241

242 **Fig. 1.** Expression of iNOS in PBC from DF patients and patients who later developed DHF  
243 collected within 4 days from fever onset (a) Fold change of iNOS between DF and DHF patient  
244 samples collected from patients recruited on, day 2 (nDF=2, nDHF=3), day 3 (nDF=6,  
245 nDHF=12), day 4 (nDF=11, nDHF=5), within 3 days (nDF=8, nDHF=15) and within 4 days  
246 (nDF=19, nDHF=20) from fever onset. (b) Fold change of iNOS expression among the male  
247 patients (nDF=13 and nDHF=17) and female patients (nDF=6 and nDHF=3) within 4 days from  
248 fever onset (c) iNOS expression in dengue patients with thrombocytopenia. Fold change of iNOS  
249 expression between PBC collected within 4 days from fever onset from patients with platelet  
250 count above 100,000 cells/mm<sup>3</sup> (n=8) compared to those below 100,000 cells/mm<sup>3</sup> (n=31) and  
251 platelet count above 60,000 cells/mm<sup>3</sup> (n=12) compared to those below 60,000 cells/mm<sup>3</sup> (n=27)  
252 during the course of infection. Fold change of expression based on  $\Delta\Delta Ct$  values against GAPDH  
253 presented as log values to the base 2, where a fold change >1.5 was considered as up regulation  
254 and < 0.5 considered as down regulation. \*P < 0.05 based on  $\Delta Ct \pm SEM$  using independent t -  
255 test.

256



257 **Table 2**

258 Relative expression of iNOS (log value to the base 2 of  $\Delta\Delta Cq$ )

|                       | Relative expression [CI, 95%] | P values |
|-----------------------|-------------------------------|----------|
| Day 2                 | 0.10 [0.00 – 3565.78]         | 0.53     |
| Day 3                 | 0.16 [0.03 – 0.95]*           | 0.04*    |
| Day 4                 | 0.21 [0.03 – 2.39]            | 0.22     |
| Within 3 days         | 0.14 [0.03 – 0.98]*           | 0.05*    |
| Within 4 days         | 0.24 [0.08 – 0.76]*           | 0.02*    |
| Male, within 4 days   | 0.24 [0.06 – 1.13]            | 0.07     |
| Female, within 4 days | 0.26 [0.06 – 1.04]            | 0.06     |

259

260 **Level of nitric oxide in plasma and saliva from acute dengue patients**

261 Expression of iNOS results in NO biosynthesis. We quantified the levels of NO in plasma  
262 using the Greiss reaction. Preliminary measurement of NO by Greiss reaction after conversion of  
263 nitrate to nitrite revealed that there was no detectable level of nitrate in the plasma samples.  
264 Therefore, the nitrite levels as measured by the Greiss reaction was taken as the total NO in the  
265 plasma and saliva samples. Among 59 patients with positive diagnosis for dengue infection,  
266 51(%) patients were classified as DF and 49 (%) patients who later showed evidence of plasma  
267 leakage (pleural effusions and ascites) were classified as DHF. Among the patients recruited for  
268 the study, 60 % of the DF subjects were male, with a median age of 25 (18-63) years and 40 %  
269 of the subjects were female with a median age of 36 (18-57) years while 83 % of the DHF  
270 subjects were male with a median age of 21 (18-46) years and 17 % of the DHF subjects were  
271 female with a median age of 30 (18-56). At enrollment, there were no statistically significant  
272 differences in mean, median, and 5<sup>th</sup> – 95<sup>th</sup> percentile of mean and median laboratory clinical  
273 parameters such as thrombocytopenia, leukopenia, hematocrit count and AST and ALT levels in  
274 patients who later developed DHF compared with DF (**Table S3**). Mean plasma NO  
275 concentration within four days from fever onset in DF group ( $23.6 \pm 4.4 \mu\text{M}$ ; n = 30) was  
276 significantly ( $P < 0.05$ ) higher than that of those who later developed DHF ( $18.1 \pm 3.1 \mu\text{M}$ ; n =  
277 29). A significant decrease in mean NO levels ( $P < 0.05$ ) in the DHF patients was observed in  
278 samples collected on day 2, day 3, day 4 and within 3 days from fever onset (**Fig. 2a**). The data  
279 are not normally distributed. Therefore, Mann-Whitney U test was used to determine significant  
280 differences. However, this decrease of plasma NO in DHF patients within four days from fever  
281 onset was observed among male patients ( $P < 0.05$ ) but not in female patients (**Fig. 2b**). This  
282 may be due to fewer number of samples collected from females who later developed DHF.  
283 Patients presenting with thrombocytopenia ( $20.6 \pm 4.1 \mu\text{M}$ ; n = 48) and patients presented with a  
284 platelet count  $<60000/\text{mm}^3$  showed a statistically significant ( $p < 0.05$ ) decrease in plasma NO  
285 levels ( $19.7 \pm 3.5 \mu\text{M}$ ; n = 34) compared to those with platelet count  $>100000/\text{mm}^3$  ( $23.4 \pm 7.1$   
286  $\mu\text{M}$ ; n = 11) and  $>60,000/\text{mm}^3$  ( $23.4 \pm 5.7 \mu\text{M}$ ; n = 25) (**Fig. 2c**).

287

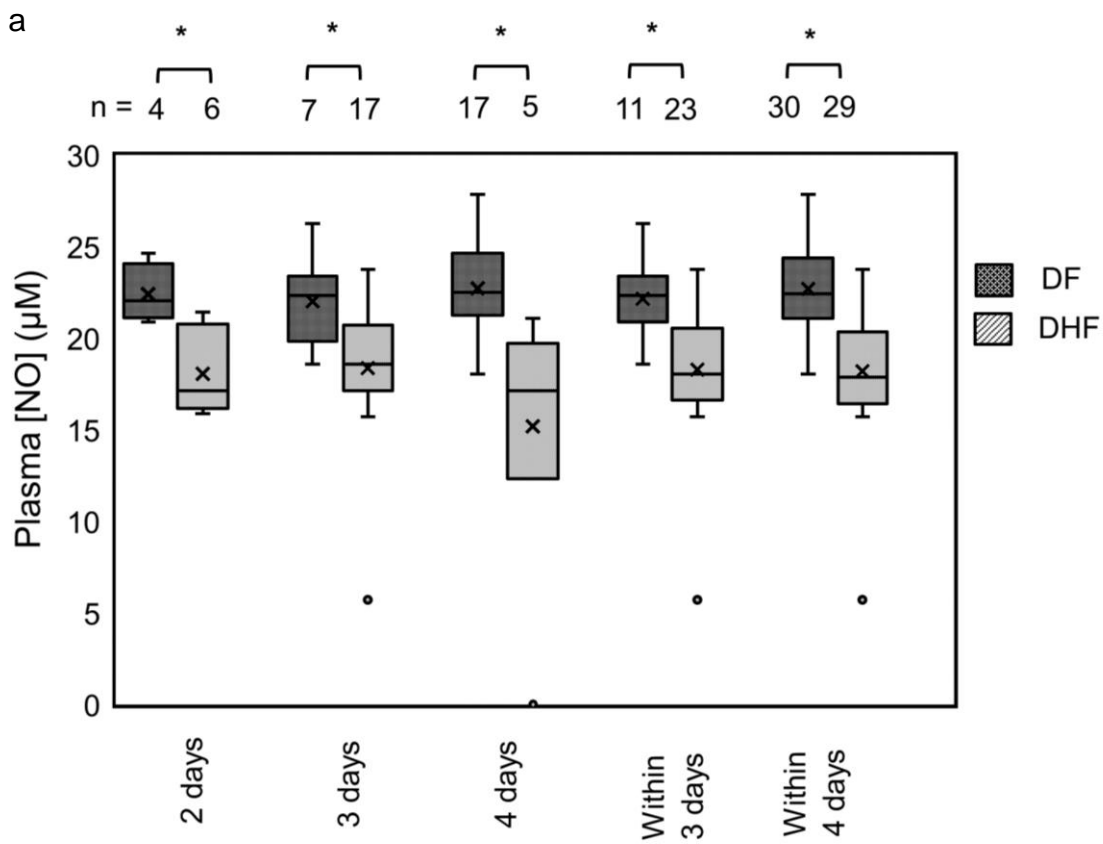

288

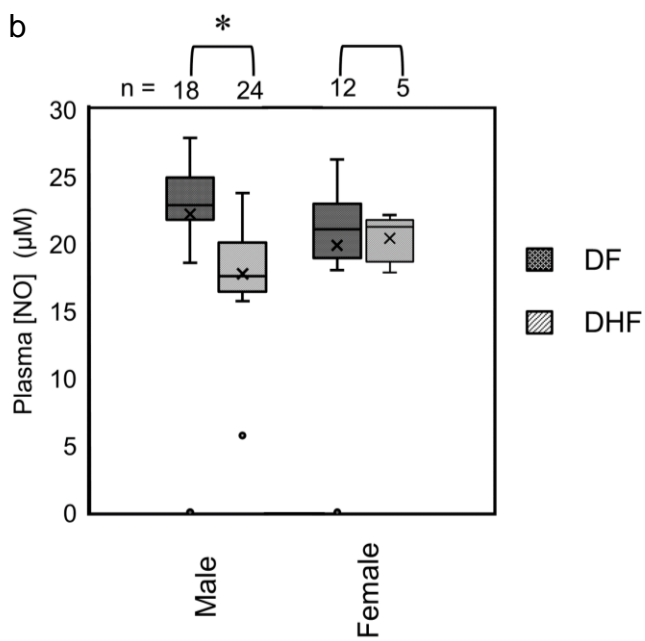

289

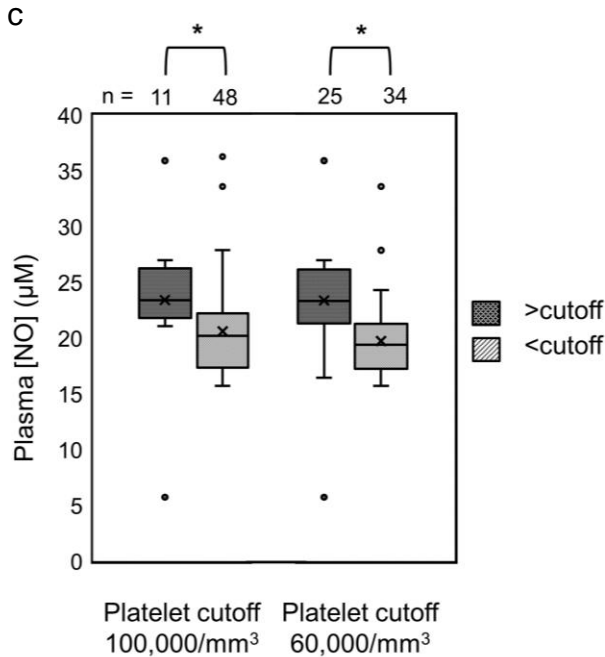

290  
 291 **Fig. 2.** NO in plasma collected from DF patients and patients who later developed DHF within 4  
 292 days from fever onset. (a) Plasma nitric oxide levels in patient samples collected on day 2 (nDF=4,  
 293 nDHF=6), day 3 (nDF=7, nDHF=17) day 4 (nDF=17, nDHF=5), within 3 days (nDF=11,  
 294 nDHF=23) and within 4 days (nDF=30, nDHF=29) from fever onset. (b) Plasma NO levels in  
 295 males (nDF=18, nDHF=24) and females (nDF=12, nDHF=5) within 4 days from fever onset. (c)  
 296 Plasma NO level in patients presented with no thrombocytopenia (n=11) against those with  
 297 thrombocytopenia (n=48) and patients presented with platelet count  $>60,000/\text{mm}^3$  (n=25) against  
 298  $<60,000/\text{mm}^3$  (n=34) during illness. \*  $P < 0.05$

299  
 300 Since saliva is a non-invasive source of biological markers, we also quantified the  
 301 salivary NO levels in 38 patients with positive diagnosis for dengue using the Greiss reaction to  
 302 evaluate the potential as an early biomarker for severe dengue. Among them, 19 (50 %) patients  
 303 were classified as DF and 19 (50 %) patients who later showed evidence of plasma leakage  
 304 (pleural effusions and ascites) were classified as DHF. Approximately 95 % of the DF subjects  
 305 were male and 5 % were female with DF patients having a median age of 23 (18-63) years while  
 306 79% of the DHF patients were male and 21 % were female with DHF patients having a median  
 307 age of 22 (18-43). At enrollment, there was a statistically significant difference in mean (DF;  
 308  $14.4 \pm 1.2$ , DHF;  $12.8 \pm 2.5$  g/dL), median, 5<sup>th</sup> – 95<sup>th</sup> percentile of mean and median hemoglobin  
 309 levels ( $P < 0.05$ ) and median (DF;  $42.1 \pm 1.3$ , DHF;  $39.7 \pm 2.3$  %), 5<sup>th</sup> – 95<sup>th</sup> percentile of mean  
 310 and median hematocrit levels among DF and DHF patients while there was no significant  
 311 difference in other laboratory clinical parameters such as thrombocytopenia, leukopenia, AST  
 312 and ALT levels in patients who later developed DHF compared with DF (Table S4). This  
 313 statistical difference in hemoglobin levels during the acute phase of infection was not observed  
 314 in the larger cohort of patient samples used for the plasma NO analysis. q-q plots and Shapiro-

315 Wilk test revealed that the salivary NO levels were not normally distributed ( $P < 0.05$ ). Therefore,  
316 Mann-Whitney U test was used to determine significant differences among the salivary NO  
317 levels. Salivary NO concentration in groups did not show a statistically significant difference in  
318 patient saliva collected within 4 days from fever onset (**Fig. 3a**). The salivary NO levels in  
319 dengue patients also did not correlate with the platelet count or the plasma NO concentration ( $r =$   
320  $-0.02$ ;  $r = 0.21$ ) (**Fig. 3b**).

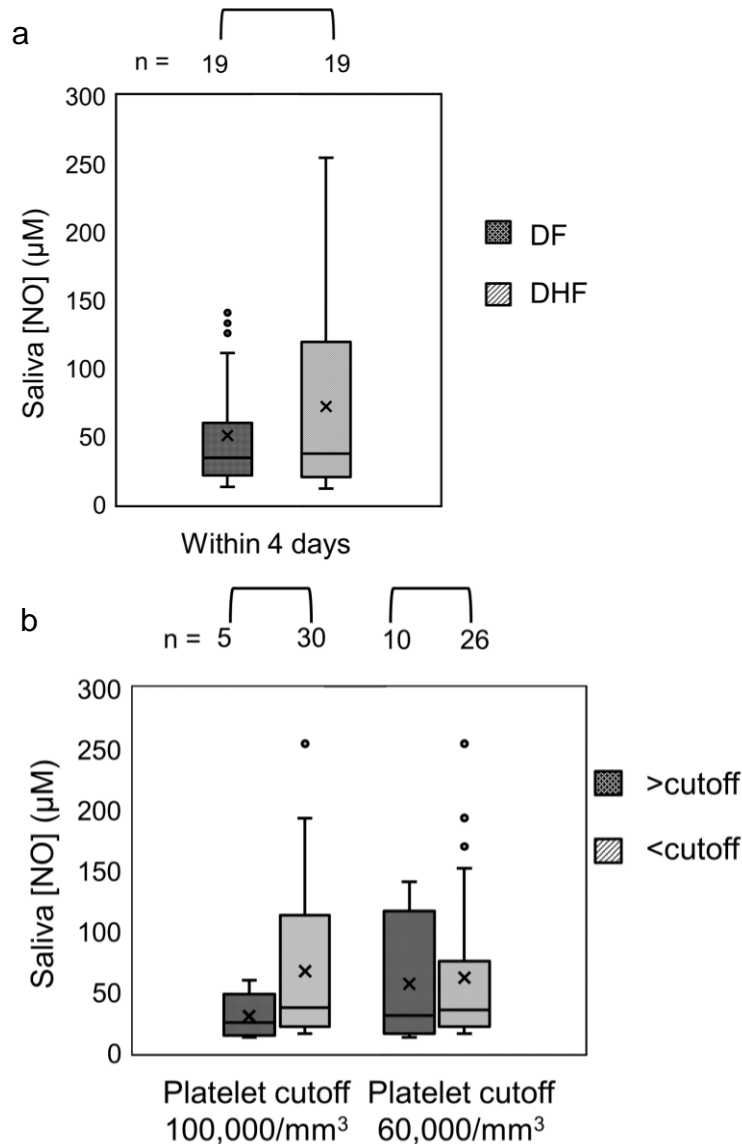

321

322

323 **Fig. 3.** NO levels in Saliva from DF patients and patients who later developed DHF collected  
324 within 4 days from fever onset. (a) Salivary NO in DF patients (n=19) and patients who later  
325 developed DHF (n=19). (b) Saliva nitric oxide levels in patients with the platelet count  
326  $>100,000/\text{mm}^3$  (n=6) against those presented with  $<100,000/\text{mm}^3$  (n=30) and patients with platelet  
327 count  $>60,000/\text{mm}^3$  (n=10) against those presented with  $<60,000/\text{mm}^3$  (n=26) during the course  
328 of illness. \* $p < 0.05$

## 329 Oxidized LDL levels in plasma and saliva

330 L-arginine-NO pathway is involved in the effects of ox-LDL on platelet function (Chen  
331 et al., 1996). Therefore, plasma oxLDL levels were analyzed in 31 dengue positive patients  
332 within four days from fever onset using ELISA. The clinical characteristics of the patients are  
333 given in **Table S5**. Mean plasma oxLDL concentration in DF ( $757.5 \pm 343.9$  ng/mL;  $n = 16$ ) was  
334 higher than that of DHF group ( $618.4 \pm 224.2$  ng/mL;  $n = 15$ ). The data are normally distributed  
335 ( $P > 0.05$ ). Although the sample numbers in each group were low, the oxLDL levels in the DHF  
336 group also showed a decrease in samples collected on day 2, day 3 and within 3 days from fever  
337 onset with a statistically significant decrease in oxLDL levels in plasma collected within 3 days  
338 from fever onset from patients who later developed DHF ( $P < 0.05$ ) (**Fig. 4a**).

339 oxLDL in sixteen saliva samples from patients with positive diagnosis for dengue within  
340 four days from fever onset were analyzed using ELISA to evaluate whether the differences  
341 observed in the plasma samples were detectable in saliva samples as well. Clinical characteristics  
342 of the patients are given in Table S6. Mean salivary oxLDL in DF patients ( $1.0 \pm 0.4$  ng/mL;  $n =$   
343  $8$ ) was significantly higher ( $p < 0.05$ ) than that of DHF patients ( $0.6 \pm 0.2$  ng/mL;  $n=8$ ) within  
344 four days from fever onset suggesting that salivary oxLDL may serve as an early marker for  
345 DHF (**Fig. 4b**). The data are normally distributed.

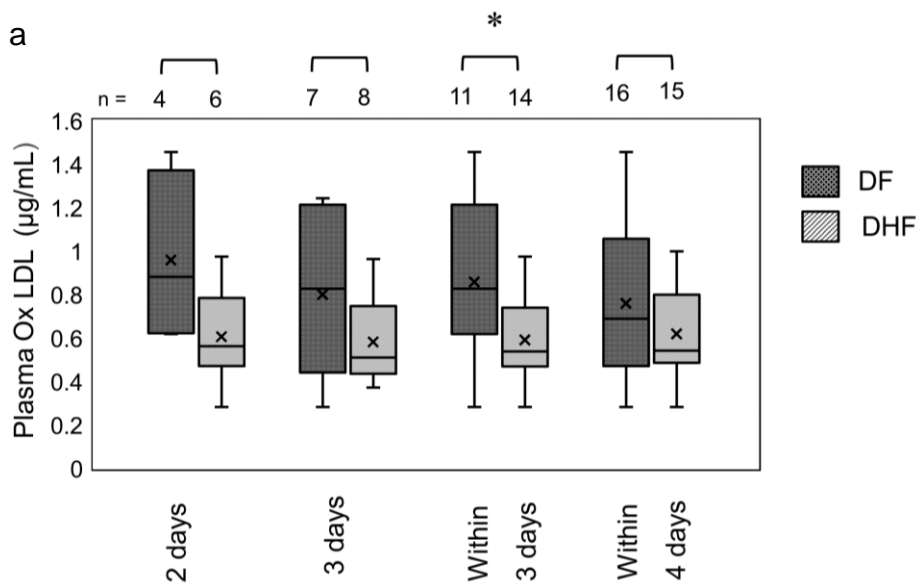

346

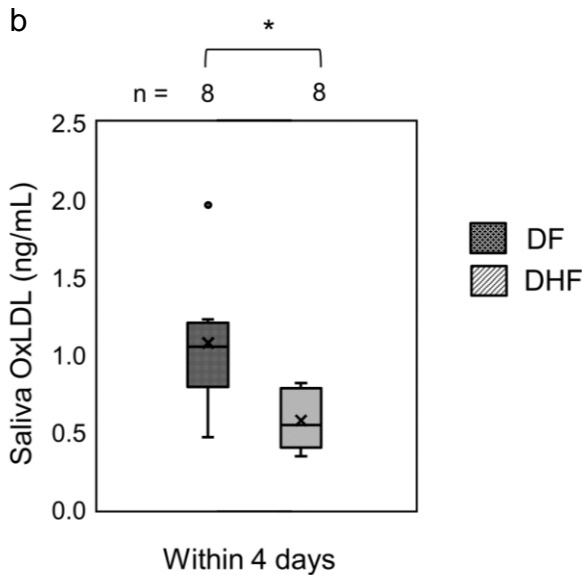

347  
348 **Fig. 4.** oxLDL in plasma and saliva from DF patients and patients who later developed DHF  
349 collected within 4 days from fever onset. (a) oxLDL levels in plasma collected on day 2 (nDF=4),  
350 nDHF=6), day 3 (nDF=7, nDHF=8), within 3 days (nDF=11, nDHF=14) and within 4 days  
351 (nDF=16, nDHF=15) from fever onset. (b) oxLDL levels in saliva from DF patients (n=8) and  
352 patients who later developed DHF (n=8) within four days from fever onset. \*p < 0.05

353

## 354 Discussion

355 iNOS expression, plasma NO, plasma oxLDL and salivary Ox LDL levels showed  
356 significant differences between the DF patients and patients who later developed severe dengue  
357 during the acute phase of infection. iNOS is implicated in host response to dengue virus infection  
358 and plasma leakage symptomatic of severe dengue (Fialho, 2017)<sup>25</sup>. Logistic regression analysis  
359 of iNOS expression within 4 days from fever onset was found to be predictive of DHF (odds  
360 ratio, 1.39; 95 % CI 1.04-1.85; P < 0.05) with an area under the receiver operating curve of 0.75.  
361 The sensitivity and specificity for the development of DHF were 0.80 and 0.63 respectively at  
362  $\Delta$ Cq for iNOS expression of -0.41. The data were determined to be normally distributed and the  
363 calculated sample size to assess the potential of iNOS as an early prognostic marker for severe  
364 dengue based on the iNOS expression levels among DF patients and patients who later  
365 developed DHF within 4 days from fever onset is 50 (n<sub>DF</sub> = 24; n<sub>DHF</sub> = 26). While iNOS has been  
366 reported to overexpress in response to dengue infection compared to healthy subjects with a  
367 corresponding increase in the NO levels, the opposite was observed between the DF patients and  
368 DHF patients during the early phase of infection<sup>25</sup> (Fialho, 2017). This may be due to the role of  
369 iNOS and NO as part of the host defense mechanism which appears to be compromised even  
370 during the early phase of infection in the individuals who later developed DHF.

371 Due to the role of iNOS in NO biosynthesis, corresponding decrease in NO levels were  
372 expected as a result of observed downregulation of iNOS expression during the acute phase of  
373 infection, which was significant within 2 days from fever onset and remained significantly low in  
374 plasma during the acute phase of infection. Logistic regression analysis of plasma NO level  
375 within 4 days from fever onset was found to be predictive of DHF (odds ratio, 0.54; 95% CI  
376 0.40-0.72;  $P < 0.01$ ) with an area under the receiver operating curve of 0.89. The sensitivity and  
377 specificity for the development of DHF were 0.90 and 0.70 respectively at plasma NO level of  
378 21.3  $\mu\text{M}$  ( $P < 0.01$ ). The calculated sample size to assess the potential of plasma NO to serve as  
379 an early prognostic marker for severe dengue within 4 days from fever onset is 20 ( $n_{\text{DF}} = 10$ ;  
380  $n_{\text{DHF}} = 10$ ) indicating that the sample size used for the analysis is within the calculated limit.  
381 These findings are consistent with the reported differences of serum NO and nitrite levels  
382 suggesting a role as early marker of disease severity for dengue<sup>27</sup> (Mapalagamage 2018).  
383 However, the plasma NO levels are at least four fold higher than serum NO levels with a clear  
384 distinction of the levels between DF patients and patients who later developed DHF with an  
385 odds ratio of approximately 0.5 for samples collected on day 3, day 4, within 3 days and 4 days  
386 from fever onset, indicating that plasma NO may serve as a more robust marker.  
387 Oxidation of lipids by NO can result in increased levels of plasma oxLDL which promotes  
388 vasoconstriction and platelet activation with alterations in platelet function which has been  
389 connected to dengue-associated plasma leakage<sup>33,34</sup> (Michels et al., 2014). A decrease of plasma  
390 oxLDL levels corresponding to the decrease in plasma NO were observed in dengue patients  
391 who later developed DHF. Therefore, the plasma oxLDL levels do not appear to participate in  
392 development of symptoms of severe dengue such as plasma leakage during the early phase of  
393 infection. Logistic regression analysis of plasma oxLDL level within 3 days from fever onset  
394 was not predictive of DHF after adjustment for number of days from fever onset (adjusted odds  
395 ratio, 1.00; 95% CI 1.00-1.00,  $P < 0.05$ ) with an area under the receiver operating curve of 0.62.  
396 The sensitivity and specificity for the development of DHF were 0.73 and 0.50 respectively at  
397 plasma oxLDL level of 729.7 ng/mL ( $P = 0.27$ ). The calculated sample size to assess the  
398 potential of plasma oxLDL to serve as a biomarker of severity of dengue infection within 4 days  
399 from fever onset based on the normally distributed data (Shapiro-Wilk test  $P$  value  $> 0.05$ ) is 392  
400 and within 3 days from fever onset is 166.

401 Similarly, salivary oxLDL levels showed a significant decrease in the patients who later  
402 developed DHF compared to the DF patients within 4 days of infection proving to be an  
403 excellent non-invasive biological source for predictive markers for dengue. Salivary oxLDL  
404 levels have been shown to correlate with the serum oxLDL levels<sup>28</sup> (De Giuseppe et al., 2015).  
405 Logistic regression analysis of salivary oxLDL levels within 4 days from fever onset was found  
406 to be predictive of DHF with an area under the receiver operating curve of 0.91. The sensitivity  
407 and specificity for the development of DHF were 0.88 and 0.75 respectively at salivary oxLDL  
408 level of 0.8 ng/mL ( $P < 0.01$ ). The calculated sample size to assess the potential of salivary  
409 oxLDL to serve as an early marker of severe dengue is 18. However, oxLDL has also been  
410 associated with cardiovascular risks<sup>28</sup> (De Giuseppe et al., 2015). Therefore, oxLDL levels in a

411 larger cohort of dengue patients during acute phase of infection may be necessary to validate the  
412 role of oxLDL in saliva as a non-invasive early prognostic biomarker of DHF and evaluate the  
413 effect of the confounding factors. Although saliva may serve as a non-invasive source for NO  
414 levels, saliva was proven to be an unreliable biological source due to high standard deviation of  
415 NO concentration that may be resulting from the influence of oral health and diet<sup>35</sup> (Mobarak).  
416 Our study is limited by the relatively small sample sizes for 2, 3 and 4 days from fever onset and  
417 relatively few samples from female patients to assess the potential of these markers to predict the  
418 outcome within these parameters. Therefore, further analysis in a larger cohort is needed to  
419 assess the full potential of these biomarkers to distinguish DF patients from those who progress  
420 to DHF during the early stages of infection. Analysis of iNOS expression, plasma NO, plasma  
421 oxLDL and saliva oxLDL in larger cohorts of dengue patients within each day from fever onset  
422 during the acute phase and analysis of each of the above variables in a larger cohort of samples  
423 from female patients is needed to evaluate the full potential of these markers to serve as early  
424 markers of severity of infection. We were also unable to determine whether dietary habits, social  
425 habits such as smoking and non-communicable conditions such as high cholesterol and diabetes  
426 influence the iNOS expression, plasma NO and plasma and salivary oxLDL among the DF and  
427 DHF patients within four days from fever onset, due to unreliable response rate from the  
428 subjects. However, differential expression of iNOS, plasma NO and salivary oxLDL levels may  
429 serve as reliable early biomarkers to predict the development of severe dengue within 4 days  
430 from fever onset. Our findings also suggest saliva as a potential new non-invasive biological  
431 source for early prognosis of disease outcome for dengue.

## 432 **Funding**

433

434 This work was supported by University of Kelaniya (Strengthening Research Grant  
435 RP/03/SR/02/06/02/2016); and National Science Foundation, Sri Lanka (RG/2015/BT/02).

436

## 437 **Conflicts of interest**

438 The authors declare to have no conflicts of interest

439

## 440 **References**

- 441 1. Bhatt S, Gething PW, Brady OJ, Messina JP, Farlow AW, Moyes CL, et al. The global  
442 distribution and burden of dengue. *Nature* 2013;**496**:504-7.
- 443 2. Brady OJ, Gething PW, Bhatt S, Messina JP, Brownstein JS, Hoen AG, et al. Refining  
444 the Global Spatial Limits of Dengue Virus Transmission by Evidence-Based Consensus.  
445 *PLoS Negl Trop Dis* 2012;**6**(8): e1760.



- 446 3. *Dengue Update*. (2016, May 23). Retrieved May 23, 2016, from Epidemiology Unit,  
447 Ministry of Health: <http://www.epid.gov.lk>.
- 448 4. Gubler DJ. Resurgent vector-borne diseases as a global health problem. *Emerg Infect Dis*  
449 1998;**4**(3):442-50.
- 450 5. Messer WB, Kanakarathne N, Thevanesam V, Ranawaka G, Shahani A, de Silva A.  
451 Clinical features of hospitalized dengue patients in Sri Lanka from 2004 to 2006. *Sri*  
452 *Lankan J. Infectious Diseases* 2012;**2**(1):9-18.
- 453 6. Sellaheewa KH. Pathogenesis of dengue hemorrhagic fever and its impact on case  
454 management. *ISRN Infect Dis* 2013;Article ID 571646.
- 455 7. Kurane I. Dengue hemorrhagic fever with special emphasis on immunopathogenesis.  
456 *Comp Immunol Microbiol Infect Dis* 2007;**30**(5-6):329-40.
- 457 8. Balfour HH. Antiviral drugs. *N Eng J Med* 1999;**340**(16):1255-68.  
458
- 459 9. Sridhar S, Luedtke A, Langevin, E, Zhu M, Bonaparte M, Machabert T, et al. Effect of  
460 dengue serostatus on dengue vaccine safety and efficacy. *N Engl J Med* 2018;**379**:327-  
461 340.  
462
- 463 10. Rico-Hesse, R. Dengue virus markers of virulence and pathogenicity. *Future Virol* 2009;  
464 **4**(6):581.
- 465 11. Bethell DB, Flobbe K, Cao XT, Day NP, Pham TP, Buurman WA, et al.  
466 Pathophysiologic and prognostic role of cytokines in dengue hemorrhagic fever. *J Infect*  
467 *Dis* 1998;**177**(3):778-82.
- 468 12. Bosch I, Khaja K, Estevez L, Raines G, Melichar H, Warke RV, et al. Increased  
469 production of interleukin-8 in primary human monocytes and in human endothelial cell  
470 lines after dengue virus challenge. *J Virol* 2002;**76**(11):5588-97.  
471
- 472 13. Lee Y-R, Lei, H-Y, Chen, S-H, Wang, J-R, Lin, Y-S, Yeh, T-M, et al. Signaling  
473 pathways involved in dengue-2 virus infection induced RANTES overexpression. *Am J*  
474 *Infect Dis* 2008;**4**(1):32-40.
- 475 14. Ubol S, Masrinoul P, Chaijaruwanich J, Kalayanarooj S, Charoensirisuthikul T, Kasisith  
476 J. Differences in global gene expression in peripheral blood mononuclear cells indicate a  
477 significant role of the innate responses in progression of dengue fever but not dengue  
478 hemorrhagic fever. *J Infect Dis* 2008;**15**;197(10):1459-67.
- 479 15. Gomes ALV, Wee LJK, Khan AM, Gil LHV, Marques Jr ETA, Calzavara-Silva CE, et  
480 al. Classification of dengue fever patients based on gene expression data using support  
481 vector machines. *PLoS ONE* 2010;**5**(6); e11267.  
482

- 483 16. Brasier AR, Ju H, Garcia J, Spratt HM, Victor SS, Forshey BM, et al. A three-component  
484 biomarker panel for prediction of dengue hemorrhagic fever. *Am J Trop Med Hyg*  
485 2012;**86**(2):341-8.
- 486 17. Malavige GN, Huang L-C, Salimi M, Gomes L, Jayaratne SD, Ogg GS. Cellular and  
487 Cytokine Correlates of Severe Dengue Infection. *PLoS ONE* 2013;**7**(11): e50387.
- 488 18. Khor CC, Chau TN, Pang J, Davila S, Long HT, Ong RT, et al. Genome-wide association  
489 study identifies susceptibility loci for dengue shock syndrome at MICB and PLCE1. *Nat*  
490 *Genet* 2012;**43**(11):1139-41.
- 491 19. García G, del Puerto F, Pérez AB, Sierra B, Aguirre E, Kikuchi M, et al. Association of  
492 MICA and MICB Alleles with Symptomatic Dengue infection. *Hum Immunol*  
493 2011;**72**:904-7.
- 494 20. Qi Y, Li Y, Zhang L, Huang J, Qi YL. (2013). microRNA expression profiling and  
495 bioinformatic analysis of dengue virus infected peripheral blood mononuclear cells. *Mol*  
496 *Med Rep* 2013;**7**(3):791-8.
- 497 21. Chen RF, Yang KD, Lee IK, Liu JW, Huang CH, Lin CY, et al. Augmented miR-150  
498 expression associated with depressed SOCS1 expression involved in dengue hemorrhagic  
499 fever. *J Infect* 2014;**69**(4):366-74.
- 500 22. Zhu X, He Z, Hu Y, Wen W, Lin C, Yu J, et al. MicroRNA-30e\* Suppresses Dengue  
501 Virus Replication by Promoting NF- $\kappa$ B-Dependent IFN Production. *PLoS Negl Trop Dis*  
502 2014; **8**(8): e3088.
- 503 23. Tambyah PA, Ching CS, Sepramaniam S, Ali JM, Armugam A, Jeyaseelan K,  
504 microRNA expression in blood of dengue patients. *Ann Clin Biochem* 2016;**53**:466-76.
- 505 24. Ouyang X, Jiang X, Gu D, Zhang Y, Kong SK, Jiang C, Xie W. Dysregulated serum  
506 miRNA profile and promising biomarkers in dengue-infected patients. *Int J Med Sci*  
507 2016;**13**(3):195-205.
- 508 25. Fialho LG, Torrentes-Carvalho A, Cunha RV, Gandini NFM, Cipitelli M, Mariade-  
509 Oliveira-Pinto L, et al. Induced nitric oxide synthase (iNOS) and indoleamine 2,3-  
510 dioxygenase (IDO) detection in circulating monocyte subsets from Brazilian patients with  
511 Dengue-4 virus. *Virology Reports* 2017;**7**:9-19.
- 512 26. Chaturvedi UC, Nagar R. Nitric oxide in dengue and dengue haemorrhagic fever:  
513 necessity or nuisance? *FEMS Immunol Med Microbiol* 2009;**56**(1):9-24.
- 514 27. Mapalagamage M, Handunnetti, S, Premawansa G, Thillainathan S, Fernando T,  
515 Kanapathipillai K. *Dis Markers* 2018; Article ID 5328681.

- 516 28. De Giuseppe R, Cossellu G, Vigna L, Dicorato F, De Vita C, Venturelli, G, et al.  
517 Correlation between salivary and serum oxidized LDL levels: a pilot study on  
518 overweight/obese subjects. *J Oral Pathol Med* 2015;**44**(10):884-7.  
519
- 520 29. Handbook for clinical management of dengue. World Health Organization. ISBN 978 92  
521 4 150471 3 World Health Organization 2012.
- 522 30. Kong Y, Zhang Y, , Zhao X., Wang G, Qingkuan Liu, Q. Carboxymethyl-chitosan  
523 attenuates inducible nitric oxide synthase and promotes interleukin-10 production in rat  
524 chondrocytes. *Exp Ther Med* 2017;**14**(6):5641-5646.
- 525 31. Giustarini D, Rossi R, Milzani A, Dalle-Donne I. Nitrite and nitrate measurement by  
526 Griess reagent in human plasma: evaluation of interferences and standardization.  
527 *Methods Enzymol* 2008;**440**:361-80.
- 528 32. Miranda KM, Espey MG, Wink DA. A discussion of the chemistry of oxidative and  
529 nitrosative stress in cytotoxicity. *J Inorg Biochem* 2000;**79**(1-4):237-40.
- 530 33. Chen LY, Mehta P, Mehta JL. Oxidized LDL decreases L-arginine uptake and nitric  
531 oxide synthase protein expression in human platelets: relevance of the effect of oxidized  
532 LDL on platelet function. *Circulation* 1996;**93**(9):1740-6.
- 533 34. Michels M, Alisjahbana B, De Groot PG, Indrati AR, Fijnheer R, Puspita M, Dewi, et al,  
534 Platelet function alterations in dengue are associated with plasma leakage. *Thromb*  
535 *Haemost* 2014;**112**(2):352-62.
- 536 35. Mobarak E.H, Abdallah, D.M. Saliva nitric oxide levels in relation to caries experience  
537 and oral hygiene. *J Adv Res* 2011;**2**(4):357-362.

538

539

540

541

542

543

544

545

546
